# Supplementary material for: BUGSnet: an R package to facilitate the conduct and reporting of Bayesian network Meta-analyses
Source: BMC Med Res Methodol. 2019 Oct 22;19:196. doi: 10.1186/s12874-019-0829-2 (PMC6805536; doi:10.1186/s12874-019-0829-2)
Supplement: Supplementary file 2 — Additional file 2. R code to compare BUGSnet with GeMTC for the analysis of the diabetes data. [file 12874_2019_829_MOESM2_ESM.r]

#Comparison of gemtc and BUGSnet

# geMTC analysis (random-effects model, logit link, binomial likelihood)

# read in data
library(readxl)
d1 <- read_excel("rate2_example.xlsx")

# reformat data so it has columns for study, treatment, responders, sampleSize
library(tidyr)
library(dplyr)
library(magrittr)
d2 <- d1 %>%
  mutate(study = as.numeric(as.factor(Study)),
         treatment = as.numeric(as.factor(Treatment))) %>%
  rename(responders = diabetes,
         sampleSize = n) %>%
  select(study, treatment, responders, sampleSize) %>%
  as.data.frame()

# set-up dataset
library(gemtc)
net.data <- mtc.network(data.ab = d2)

# initialize model
net.model <- mtc.model(net.data, 
                       n.chain = 1,
                       type="consistency",
                       likelihood="binom",
                       link="logit",
                       linearModel="random")

# run the MCMC chains
mcmc.samples <- mtc.run(net.model, n.adapt = 10000, n.iter = 150000)

# function to convert league table back to original scale 
library(stringr)
conv_exp <- function(x) {
  strsplit(x, split="[ \\(\\),]")[[1]][c(1,3,5)] %>% #split into mean, lower, upper
    as.numeric %>%
    exp() %>%
    formatC(digits=2, format= "f") %>% #keep two decimals
    str_c(c(" (", ", ", ")")) %>% #put back into string
    paste0(collapse="") %>% #put back into string
    return()
}

league.tab <- relative.effect.table(mcmc.samples) %>% as.data.frame()

# exponentiate values
league.tab2 <- apply(league.tab, MARGIN=c(1,2), FUN=conv_exp) %>%
  as.data.frame()

# convert to character
league.tab2[sapply(league.tab2, is.factor)] <- lapply(league.tab2[sapply(league.tab2, is.factor)], as.character)

# replace diagonals with treatment names
trt.names <- d1 %>%
  mutate(treatment = as.numeric(as.factor(Treatment))) %>%
  select(Treatment, treatment) %>%
  unique() %>%
  arrange(treatment) %>%
  mutate(trt = as.character(Treatment)) %>%
  select(trt) %>%
  pull()

for(i in 1:length(trt.names)) {
  league.tab2[i,i] <- trt.names[i]
}

gemtc.league <- league.tab2
write.table(gemtc.league, "diab_gemtc_league.csv", row.names=FALSE, col.names = FALSE)

# Repeat analysis using BUGSnet
library(BUGSnet)

# load dataset
data(diabetes)
rate2.slr <- data.prep(arm.data = diabetes,
                       varname.t = "Treatment",
                       varname.s = "Study")

# initialize model
random_effects_model <- nma.model(data=rate2.slr,
                                  outcome="diabetes",
                                  N="n",
                                  reference="Diuretic",
                                  family="binomial",
                                  link="logit",
                                  effects= "random")

# run the MCMC chains
random_effects_results <- nma.run(random_effects_model,
                                  n.adapt=10000,
                                  n.burnin=0,
                                  n.iter=150000)

# extract the results in a league table 
league.out <- nma.league(random_effects_results,  
                         central.tdcy="median",
                         log.scale = FALSE,
                         digits = 2,
                         order = trt.names)

bugsnet.league <- league.out$table
write.table(bugsnet.league, "diab_bugsnet.league.csv", row.names=FALSE, col.names = FALSE)
