# Supplementary material for: BUGSnet: an R package to facilitate the conduct and reporting of Bayesian network Meta-analyses
Source: BMC Med Res Methodol. 2019 Oct 22;19:196. doi: 10.1186/s12874-019-0829-2 (PMC6805536; doi:10.1186/s12874-019-0829-2)
Supplement: Supplementary file 3 — Additional file 3. Diabetes dataset to accompany the R code in Additional file 2. [file 12874_2019_829_MOESM3_ESM.xlsx]

## Sheet: Sheet1
Study	followup	trtnum	Treatment	diabetes	n	age	age_SD	age_type
MRC-E	5.8	1	Diuretic	43	1081	60.7	14.26	mean & SD
MRC-E	5.8	2	Placebo	34	2213	59.2	13.1	mean & SD
MRC-E	5.8	3	blocker	37	1102	60.2	14	mean & SD
EWPH	4.7	1	Diuretic	29	416	59	15.2	mean & SD
EWPH	4.7	2	Placebo	20	424	57	14.8	mean & SD
SHEP	3	1	Diuretic	140	1631	63.1	13.2	mean & SD
SHEP	3	2	Placebo	118	1578	62.2	13.2	mean & SD
HAPPHY	3.8	1	Diuretic	75	3272	62		mean
HAPPHY	3.8	3	blocker	86	3297	67		mean
ALLHAT	4	1	Diuretic	302	6766	53	15.5	mean & SD
ALLHAT	4	4	CCB	154	3954	57	15.2	mean & SD
ALLHAT	4	5	ACE inhibitor	119	4096	58	14.9	mean & SD
INSIGHT	3	1	Diuretic	176	2511	56	11.9	mean & SD
INSIGHT	3	4	CCB	136	2508	59	11.6	mean & SD
ANBP-2	4.1	1	Diuretic	200	2826	60.4	4.7	mean & SD
ANBP-2	4.1	5	ACE inhibitor	138	2800	59.9	4.8	mean & SD
ALPINE	1	1	Diuretic	8	196	60	9.3	mean & SD
ALPINE	1	6	ARB	1	196	60	9.6	mean & SD
FEVER	3.3	2	Placebo	154	4870	56.2	14.8	mean & SD
FEVER	3.3	4	CCB	177	4841	56.7	14.5	mean & SD
DREAM	3	2	Placebo	489	2646	59.7	11.2	mean & SD
DREAM	3	5	ACE inhibitor	449	2623	59.1	11	mean & SD
HOPE	4.5	2	Placebo	155	2883	59.3	16.9	mean & SD
HOPE	4.5	5	ACE inhibitor	102	2837	55.3	16.6	mean & SD
PEACE	4.8	2	Placebo	399	3472	65	12	mean & SD
PEACE	4.8	5	ACE inhibitor	335	3432	65	11.7	mean & SD
CHARM	3.1	2	Placebo	202	2721	54		mean
CHARM	3.1	6	ARB	163	2715	55		mean
SCOPE	3.7	2	Placebo	115	2175	63	12.5	mean & SD
SCOPE	3.7	6	ARB	93	2167	66.3	12.5	mean & SD
AASK	3.8	3	blocker	70	405	53.2	10.3	mean & SD
AASK	3.8	4	CCB	32	202	55.9	10.4	mean & SD
AASK	3.8	5	ACE inhibitor	45	410	58.1	11.1	mean & SD
STOP-2	4	3	blocker	97	1960	60.3	15.1	mean & SD
STOP-2	4	4	CCB	95	1965	59.1	14.1	mean & SD
STOP-2	4	5	ACE inhibitor	93	1970	59.6	13.9	mean & SD
ASCOT	5.5	3	blocker	799	7040	59.3	8.3	mean & SD
ASCOT	5.5	4	CCB	567	7072	59.1	8.9	mean & SD
NORDIL	4.5	3	blocker	251	5059	58.8	10.5	mean & SD
NORDIL	4.5	4	CCB	216	5095	56.5	11	mean & SD
INVEST	4	3	blocker	665	8078	59.1	11.2	mean & SD
INVEST	4	4	CCB	569	8098	56	11.8	mean & SD
CAPPP	6.1	3	blocker	380	5230	58.2	15.9	mean & SD
CAPPP	6.1	5	ACE inhibitor	337	5183	57.1	14.8	mean & SD
LIFE	4.8	3	blocker	320	3979	62.3	10.74	mean & SD
LIFE	4.8	6	ARB	242	4020	66.1	12	mean & SD
VALUE	4.2	4	CCB	845	5074	56.4	13.1	mean & SD
VALUE	4.2	6	ARB	690	5087	57.8	13	mean & SD

## Sheet: Sheet2
Study	followup	trtnum	Treatment	diabetes	n	Rates
AASK	3.8	3	blocker	70	405	0.0454841	1539
AASK	3.8	4	CCB	32	202	0.0416884	767.6
AASK	3.8	5	ACE inhibitor	45	410	0.0288832	1558
ALLHAT	4	1	Diuretic	302	6766	0.0111587	27064
ALLHAT	4	4	CCB	154	3954	0.00973698	15816
ALLHAT	4	5	ACE inhibitor	119	4096	0.00726318	16384
ALPINE	1	1	Diuretic	8	196	0.0408163	196
ALPINE	1	6	ARB	1	196	0.00510204	196
ANBP-2	4.1	1	Diuretic	200	2826	0.0172613	11586.6
ANBP-2	4.1	5	ACE inhibitor	138	2800	0.0120209	11480
ASCOT	5.5	3	blocker	799	7040	0.0206353	38720
ASCOT	5.5	4	CCB	567	7072	0.0145773	38896
CAPPP	6.1	3	blocker	380	5230	0.0119111	31903
CAPPP	6.1	5	ACE inhibitor	337	5183	0.0106591	31616.3
CHARM	3.1	2	Placebo	202	2721	0.0239476	8435.1
CHARM	3.1	6	ARB	163	2715	0.0193667	8416.5
DREAM	3	2	Placebo	489	2646	0.0616024	7938
DREAM	3	5	ACE inhibitor	449	2623	0.0570593	7869
EWPH	4.7	1	Diuretic	29	416	0.0148322	1955.2
EWPH	4.7	2	Placebo	20	424	0.0100361	1992.8
FEVER	3.3	2	Placebo	154	4870	0.00958248	16071
FEVER	3.3	4	CCB	177	4841	0.0110796	15975.3
HAPPHY	3.8	1	Diuretic	75	3272	0.00603204	12433.6
HAPPHY	3.8	3	blocker	86	3297	0.00686429	12528.6
HOPE	4.5	2	Placebo	155	2883	0.0119474	12973.5
HOPE	4.5	5	ACE inhibitor	1022	2837	0.0800533	12766.5
INSIGHT	3	1	Diuretic	176	2511	0.0233639	7533
INSIGHT	3	4	CCB	136	2508	0.0180755	7524
INVEST	4	3	blocker	665	8078	0.0205806	32312
INVEST	4	4	CCB	569	8098	0.0175661	32392
LIFE	4.8	3	blocker	320	3979	0.0167546	19099.2
LIFE	4.8	6	ARB	242	4020	0.0125415	19296
MRC-E	5.8	1	Diuretic	43	1081	0.00685827	6269.8
MRC-E	5.8	2	Placebo	34	2213	0.00264892	12835.4
MRC-E	5.8	3	blocker	37	1102	0.00578885	6391.6
NORDIL	4.5	3	blocker	251	5059	0.0110255	22765.5
NORDIL	4.5	4	CCB	216	5095	0.009421	22927.5
PEACE	4.8	2	Placebo	399	3472	0.0239415	16665.6
PEACE	4.8	5	ACE inhibitor	335	3432	0.0203356	16473.6
SCOPE	3.7	2	Placebo	115	2175	0.0142902	8047.5
SCOPE	3.7	6	ARB	93	2167	0.011599	8017.9
SHEP	3	1	Diuretic	140	1631	0.0286123	4893
SHEP	3	2	Placebo	118	1578	0.0249261	4734
STOP-2	4	3	blocker	97	1960	0.0123724	7840
STOP-2	4	4	CCB	95	1965	0.0120865	7860
STOP-2	4	5	ACE inhibitor	93	1970	0.011802	7880
VALUE	4.2	4	CCB	845	5074	0.0396513	21310.8
VALUE	4.2	6	ARB	690	5087	0.0322952	21365.4
