# Supplementary material for: BUGSnet: an R package to facilitate the conduct and reporting of Bayesian network Meta-analyses
Source: BMC Med Res Methodol. 2019 Oct 22;19:196. doi: 10.1186/s12874-019-0829-2 (PMC6805536; doi:10.1186/s12874-019-0829-2)
Supplement: Supplementary file 4 — Additional file 4. BUGSnet league table obtained from the R code in Additional file 2. [file 12874_2019_829_MOESM4_ESM.csv]

ACE inhibitor "0.93 (0.75 to 1.14)" "1.40 (1.20 to 1.66)" "1.18 (1.01 to 1.40)" "1.51 (1.28 to 1.82)" "1.13 (0.96 to 1.31)"
1.08 (0.87 to 1.34) "ARB" "1.52 (1.25 to 1.87)" "1.27 (1.06 to 1.57)" "1.63 (1.31 to 2.08)" "1.22 (1.00 to 1.48)"
0.71 (0.60 to 0.83) "0.66 (0.53 to 0.80)" "blocker" "0.84 (0.74 to 0.96)" "1.08 (0.90 to 1.30)" "0.80 (0.66 to 0.95)"
0.85 (0.71 to 0.99) "0.78 (0.64 to 0.94)" "1.19 (1.04 to 1.36)" "CCB" "1.28 (1.08 to 1.53)" "0.95 (0.79 to 1.12)"
0.66 (0.55 to 0.78) "0.61 (0.48 to 0.76)" "0.93 (0.77 to 1.11)" "0.78 (0.65 to 0.93)" "Diuretic" "0.74 (0.61 to 0.88)"
0.89 (0.76 to 1.04) "0.82 (0.68 to 1.00)" "1.25 (1.05 to 1.50)" "1.05 (0.89 to 1.26)" "1.34 (1.13 to 1.64)" "Placebo"
